# Supplementary material for: Rational Design of Disulfide Bridges in BbPETaseCD for Enhancing the Enzymatic Performance in PET Degradation
Source: MDPI journal article supplement (doi:10.3390/molecules28083528), 2023-04-17
Supplement: s1 [file s1]

# Supplementary Materials

## Rational Design of Disulfide Bridges in *Bb*PETase<sup>CD</sup> for Enhancing the Enzymatic Performance in PET Degradation

Dongjian Huang <sup>1</sup>, Lin Zhang <sup>1,2</sup> and Yan Sun <sup>1,2,\*</sup>

<sup>1</sup> Department of Biochemical Engineering, School of Chemical Engineering and Technology, Tianjin University, Tianjin 300350, China; huangdongjian@tju.edu.cn (D.H.); linzhang@tju.edu.cn (L.Z.)

<sup>2</sup> Key Laboratory of Systems Bioengineering and Frontiers Science Center for Synthetic Biology (Ministry of Education), Tianjin University, Tianjin 300350, China

\* Correspondence: ysun@tju.edu.cn

**Table S1.** Information on primers used for targeted mutagenesis

| Primer        | Primer sequence (5' to 3')                       |
|---------------|--------------------------------------------------|
| Forward-P207C | CGTGACGGGCT <u>TGCT</u> TTGCGGCGGTGGCGGTGGTGCC   |
| Reverse-P207C | CCGCCGCAAAG <u>CA</u> GCCCCGTACGTTGGTCGGATGAT    |
| Forward-D280C | TCGCAAAGTGT <u>TGT</u> TCCGAACCGCCTGGGCGTGATGGG  |
| Reverse-D280C | GGCGGTTTCGG <u>ACA</u> CACTTTGCGATAAATCGGATGGC   |
| Forward-A209C | GGGCCCCGTTT <u>TGCG</u> CGGTGGCGGTGGTGCCGGGCTA   |
| Reverse-A209C | CCGCCACCGCG <u>GCA</u> AAACGGGCCCCGTACGTTGGTCG   |
| Forward-R283C | GGATCCGAAC <u>TGC</u> CTGGGCGTGATGGGCTGGAGCAT    |
| Reverse-R283C | TCACGCCCAG <u>GCA</u> GTTCGGATCCACTTTGCGATAAA    |
| Forward-N364C | TCTGGAAATGT <u>TGCA</u> ACGGCAGCCATAGCTGCGCGAA   |
| Reverse-N364C | GGCTGCCGTT <u>GCA</u> CATTTCCAGATACGCTTTTTTTGG   |
| Forward-D418C | GACCGCGATT <u>TGT</u> GAAATATCGCGAAAACCTGCCCCGTA |
| Reverse-D418C | CGCGATATT <u>ACA</u> AAATCGCGGTCAGGCTCAGATCCG    |

Note: where the underline indicates the codon or anticodon in the primer.

**Table S2.** Expression of *Bb*PETase<sup>CD</sup> and its variants

| Enzyme                         | Protein expression (mg/L) |
|--------------------------------|---------------------------|
| <i>Bb</i> PETase <sup>CD</sup> | 24.04                     |
| P207C/D280C                    | 1.22                      |
| A209C/R283C                    | 1.69                      |
| N364C/D418C                    | 27.77                     |
| P207C/D280C/N364C/D418C        | 0.91                      |
| A209C/R283C/N364C/D418C        | 1.09                      |

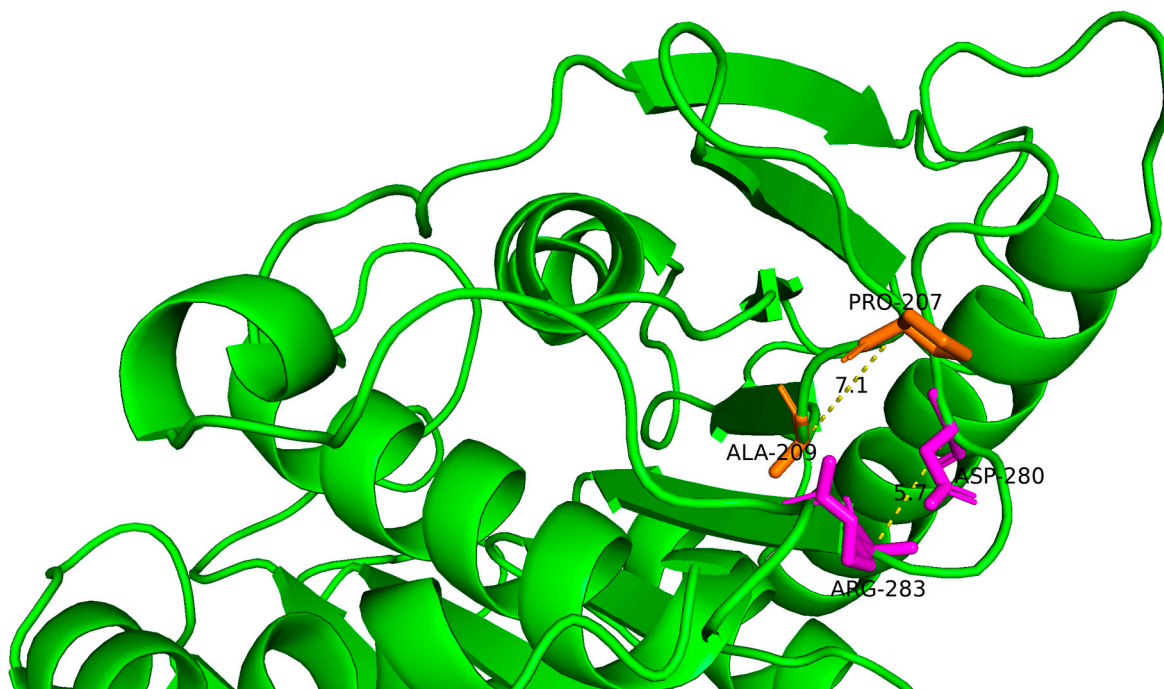

**Figure S1.** Diagram of the distance between P207 and A209 and the distance between D280 and R283 in the *Bb*PETase<sup>CD</sup> structure (PDB ID: 7CWQ).

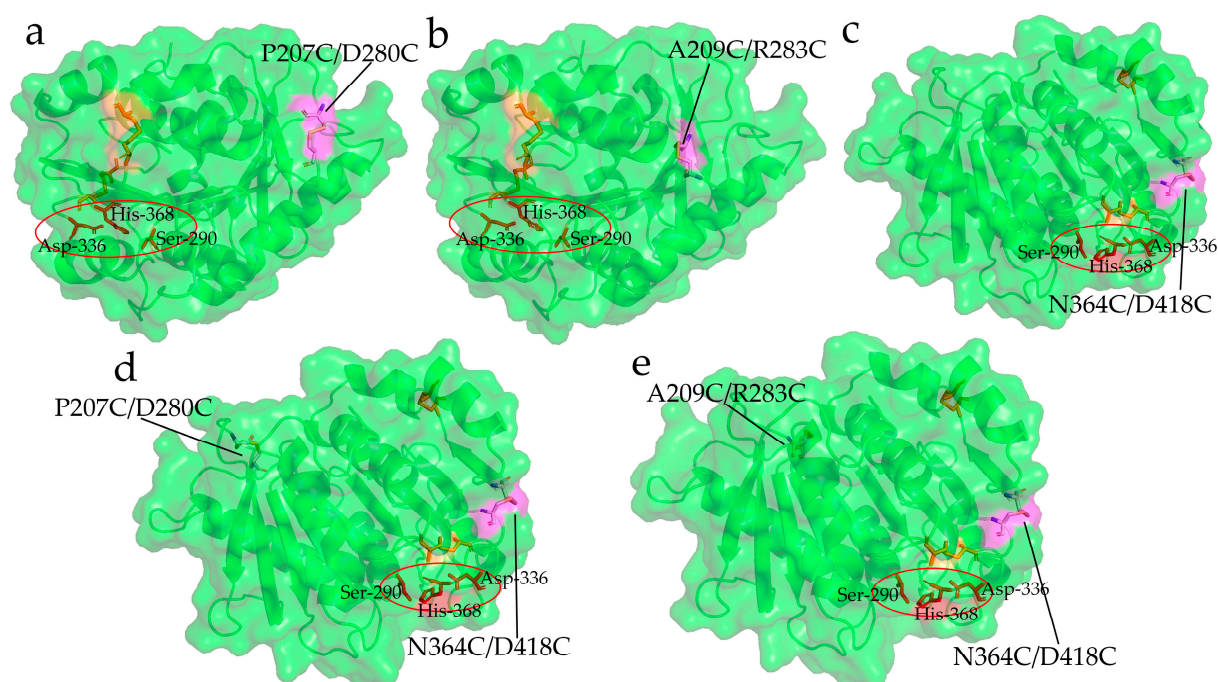

**Figure S2.** Location of disulfide bridges in variants of *Bb*PETase<sup>CD</sup>, where the natural disulfide bridges in the enzyme are marked in orange and the mutation-introduced disulfide bridges are marked in purple. The amino acid residues marked in red are the catalytic active sites of *Bb*PETase<sup>CD</sup>. (a) P207/D280C variant, (b) A209C/R283C variant, (c) N364C/D418C variant, (d) P207/D280C/N364C/D418C variant, (e) A209C/R283C/N364C/D418C variant.

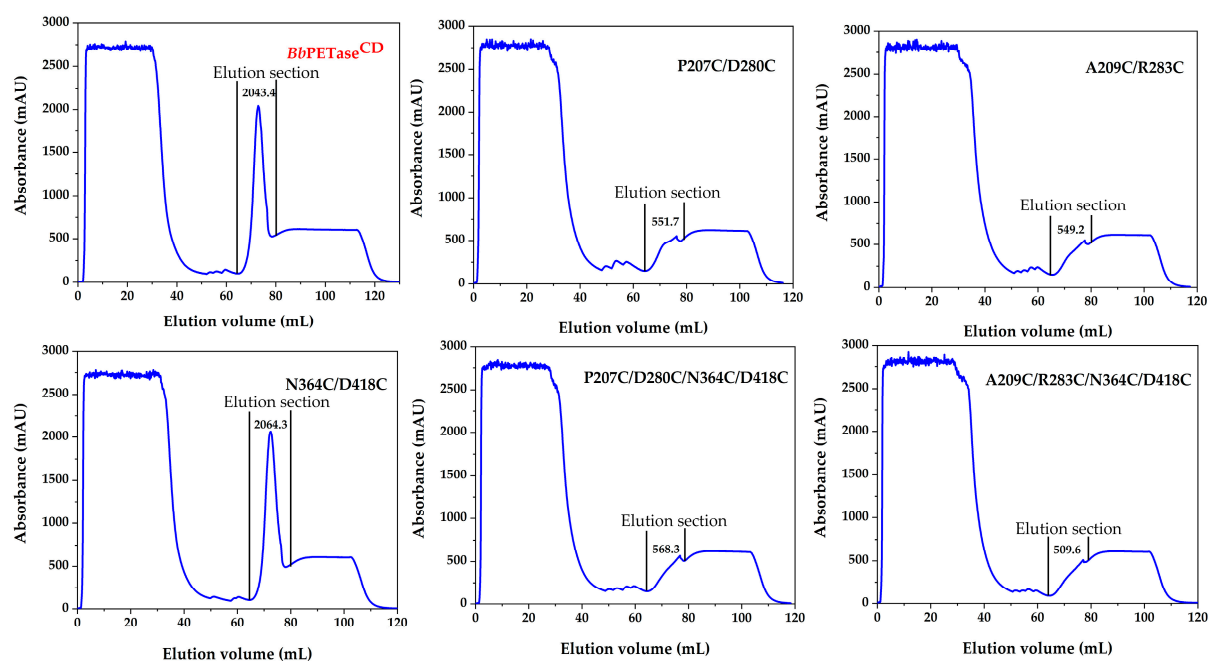

**Figure S3.** Affinity purification of *Bb*PETase<sup>CD</sup> and its variants using Nickel ion affinity chromatography, where the elution section is the gradient elution stage and the numbers indicate the absorbance of the eluted peak.

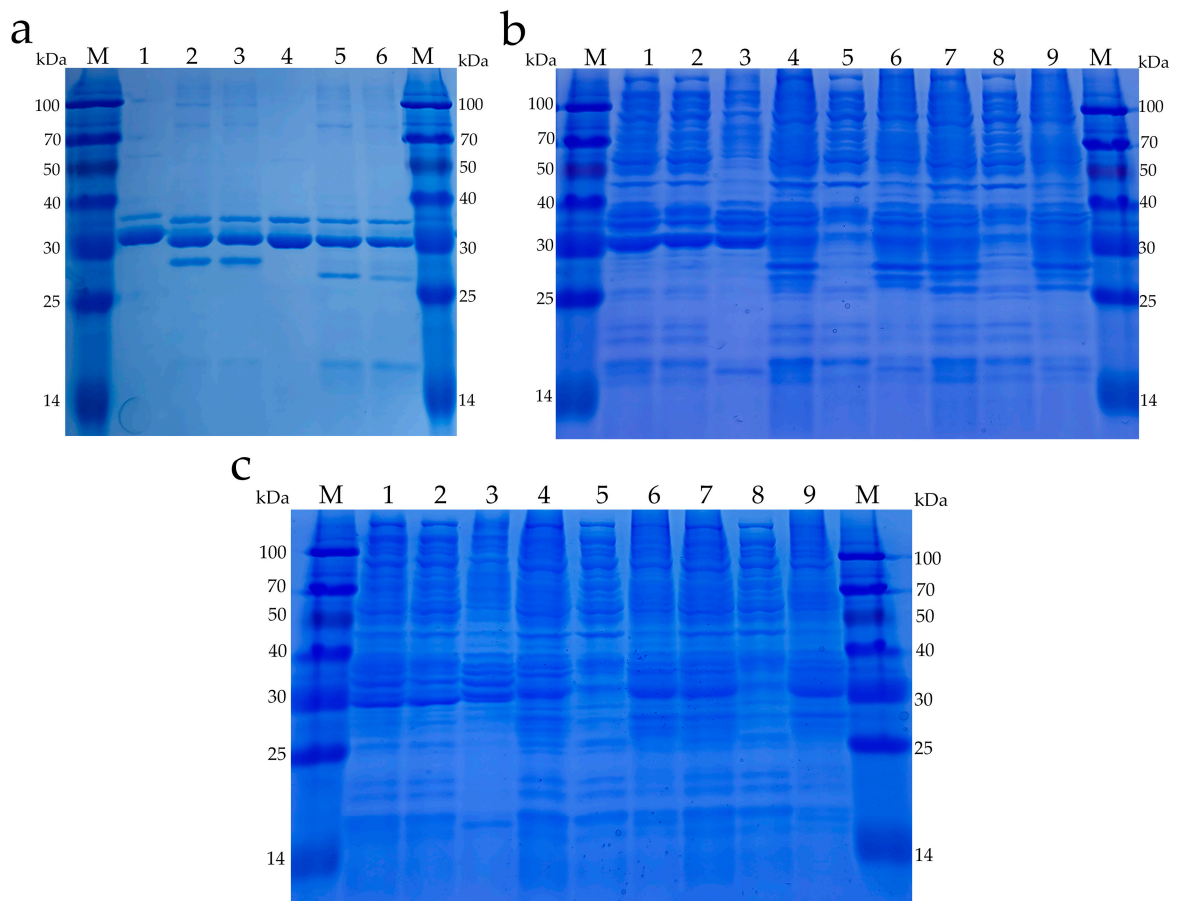

**Figure S4.** (a) SDS-PAGE of *BbPETase*<sup>CD</sup> and its variants in nonreducing condition. M: Marker, Lane1: *BbPETase*<sup>CD</sup>; Lane2: P207/D280C variant; Lane3: A209C/R283C variant; Lane4: N364C/D418C variant; Lane5: P207/D280C/N364C/D418C variant; Lane6: A209C/R283C/N364C/D418C variant. The loading concentration of each gel lane is 0.2175mg/ml, and the loading volume is 10μl. (b) Lane1: bacterial lysate of *BbPETase*<sup>CD</sup>; Lane2: supernatant of *BbPETase*<sup>CD</sup>; Lane3: precipitate of *BbPETase*<sup>CD</sup>; Lane4: bacterial lysate of P207/D280C variant; Lane5: supernatant of P207/D280C variant; Lane6: precipitate of P207/D280C variant.

Lane7: bacterial lysate of A209C/R283C variant; Lane8: supernatant of A209C/R283C variant; Lane9: precipitate of A209C/R283C variant. (c) Lane1: bacterial lysate of N364C/D418C variant; Lane2: supernatant of N364C/D418C variant; Lane3: precipitate of N364C/D418C variant; Lane4: bacterial lysate of P207/D280C/N364C/D418C variant; Lane5: supernatant of P207/D280C/N364C/D418C variant; Lane6: precipitate of P207/D280C/N364C/D418C variant.

Lane7: bacterial lysate of A209C/R283C/N364C/D418C; Lane8: supernatant of A209C/R283C/N364C/D418C variant; Lane9: precipitate of A209C/R283C/N364C/D418C variant.



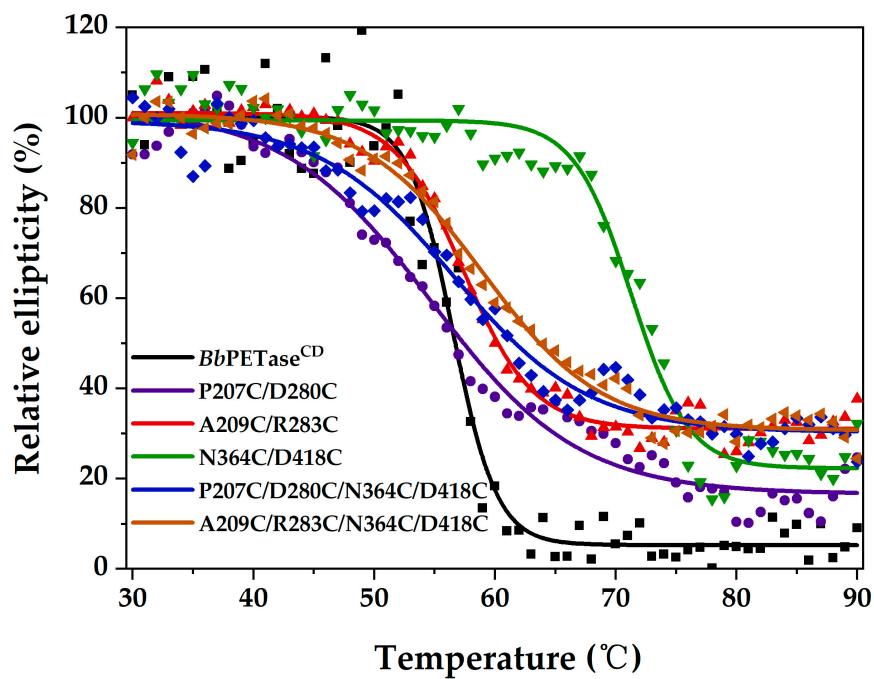

**Figure S5.** Melting curves of *Bb*PETase<sup>CD</sup> and its variants.

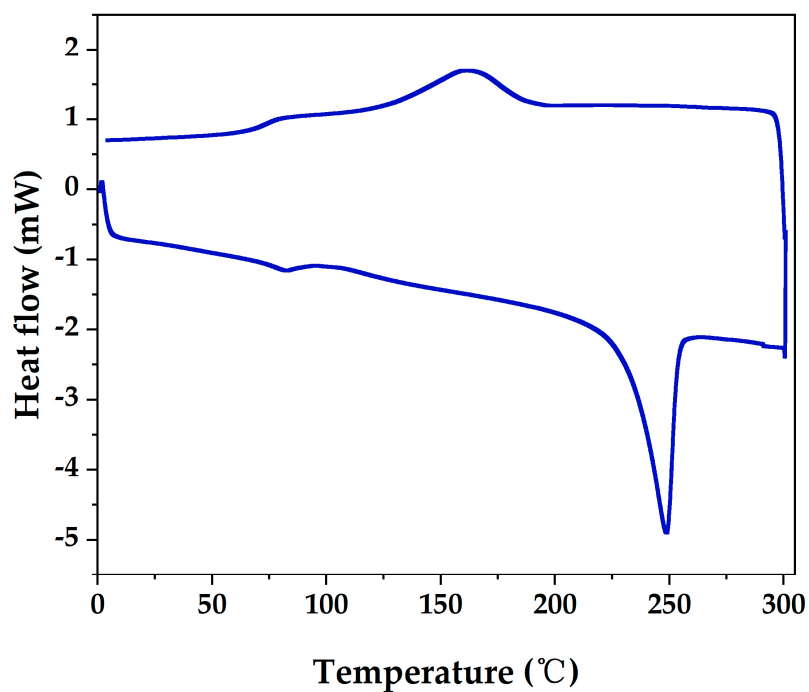

**Figure S6.** DSC diagram of Nongfu Spring mineral water bottle.

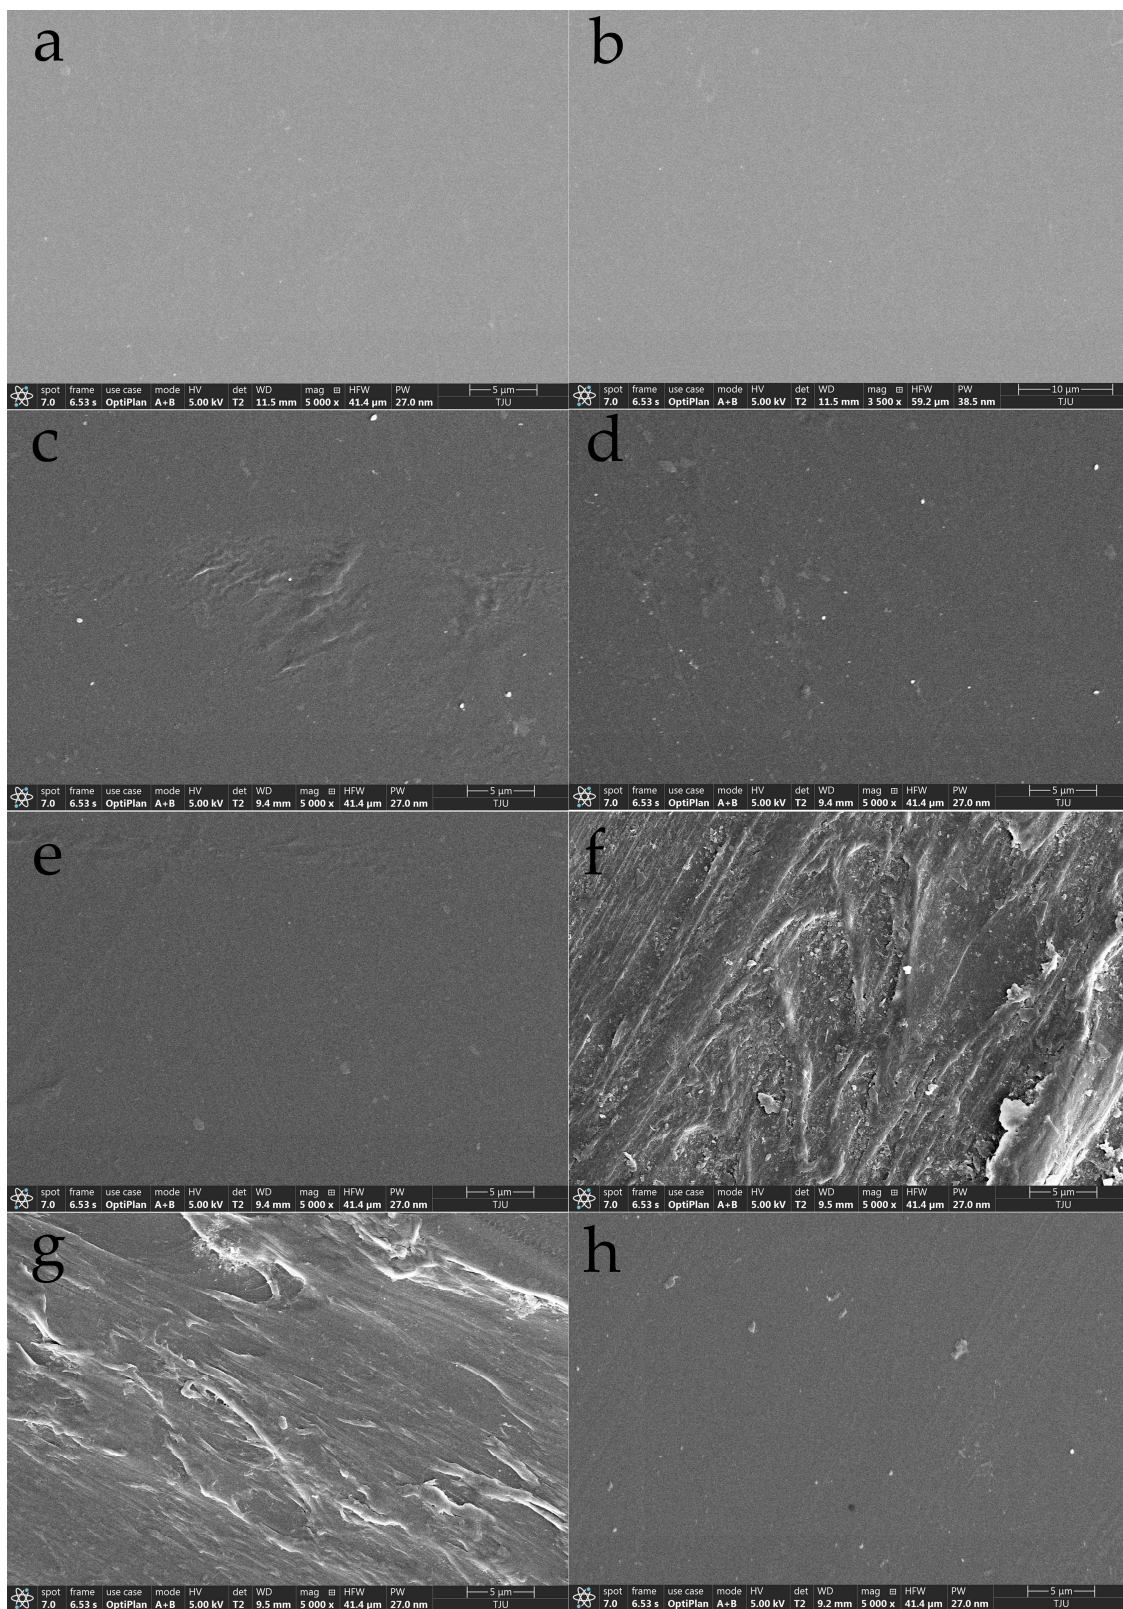

**Figure S7.** SEM pictures of PET film after 14 days of incubation with *Bb*PETase<sup>CD</sup> and its variants. (a) and (b) are SEM pictures of unreacted PET film at different magnifications, and the remaining SEM pictures are PET film after incubation with (c) *Bb*PETase<sup>CD</sup>, (d) P207/D280C variant, (e) A209C/R283C variant, (f) N364C/D418C variant, (g) P207/D280C/N364C/D418C variant, (h) A209C/R283C/N364C/D418C variant.

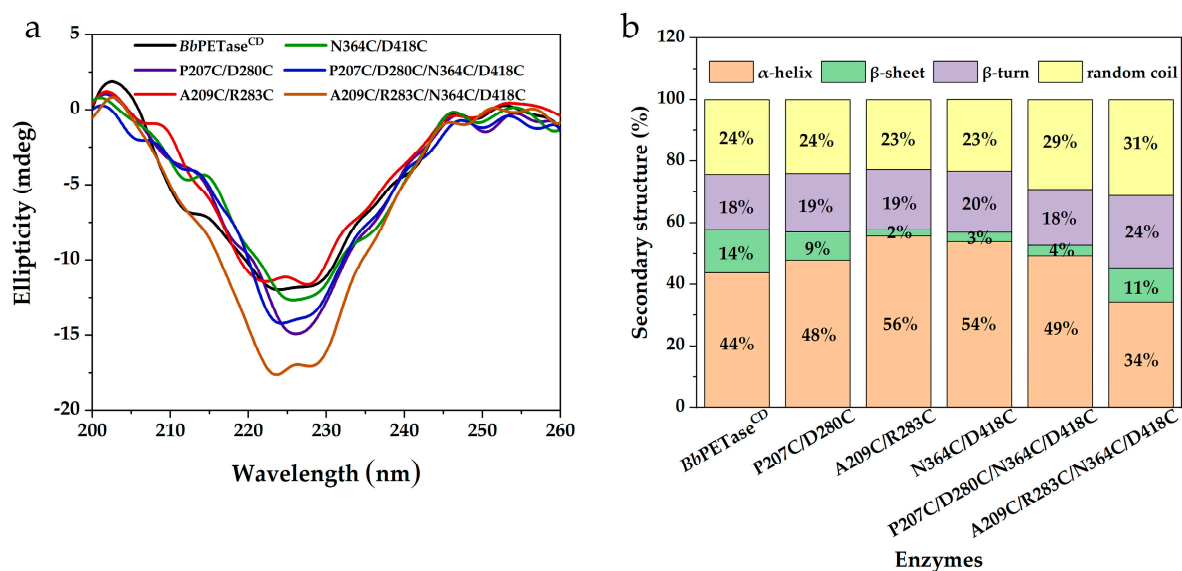

**Figure S8.** CD spectra of *Bb*PETase<sup>CD</sup> and its variants (a) with secondary structure content (b).

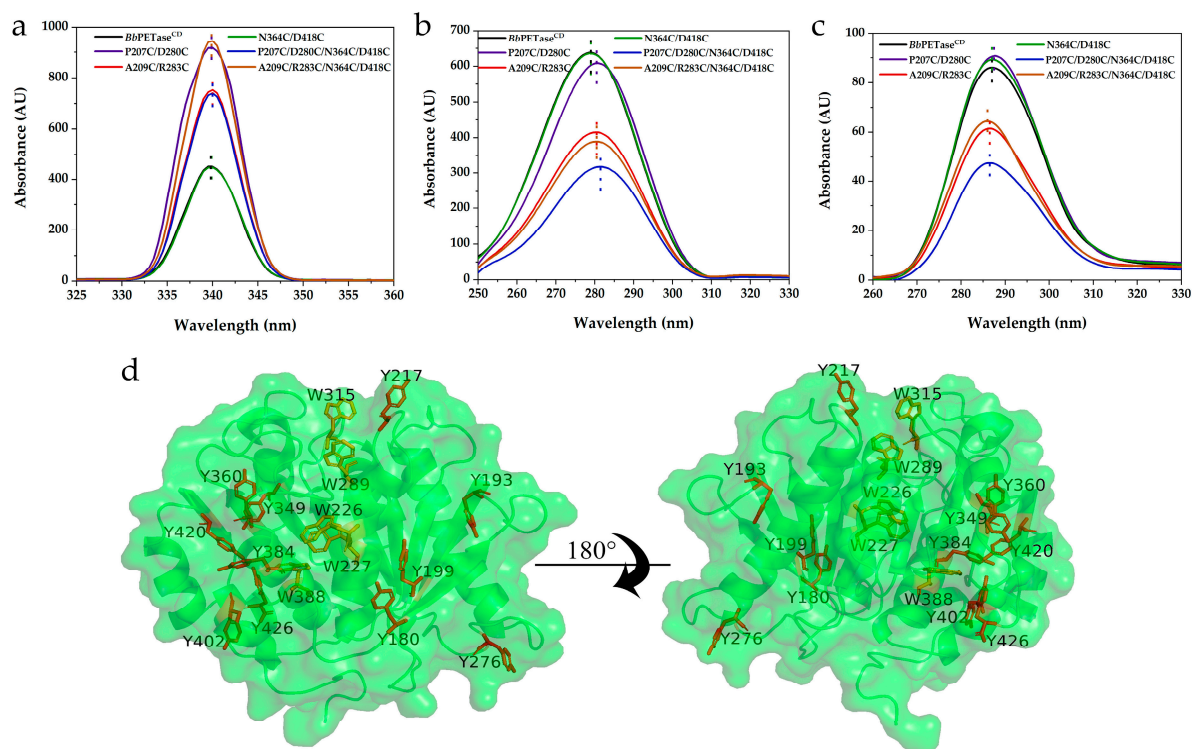

**Figure S9.** Fluorescence spectra (a), endogenous tryptophan fluorescence spectra (b) and endogenous tyrosine fluorescence spectra (c) of *Bb*PETase<sup>CD</sup> and its variants, (d) position of tryptophan (orange) and tyrosine (red) in *Bb*PETase<sup>CD</sup> (PDB ID: 7CWQ).
